# Supplementary material for: Two Co(ii) complexes containing pyridylbenzimidazole ligands as chemosensors for the sensing of levofloxacin, acetylacetone, and Ni2+with high selectivity and sensitivity
Source: Royal Society of Chemistry journal article supplement (doi:10.1039/d1ce01271a), 2021-01-01
Supplement: d1ce01271a1.pdf [file d1ce01271a1.pdf]

Two Co(II) complexes containing pyridylbenzimidazole ligands as chemosensors for sensing of levofloxacin, acetylacetone, and Ni<sup>2+</sup> with high selectivity and sensitivity

Ming-Yue Wen, Li Ren, Guang-Hua Cui\*

*College of Chemical Engineering, Hebei Key Laboratory for Environment Photocatalytic and Electrocatalytic Materials, North China University of Science and Technology, No. 21 Bohai Road, Caofeidian new-city, Tangshan, Hebei, 063210, P. R. China*

\* Corresponding author. Fax: +86-315-8805462, Tel: +86-315-8805460.

\*E-mail: [tscghua@126.com](mailto:tscghua@126.com)

## Materials and methods

All of the reagents and solvents were commercially purchased directly and did not further purified. Elemental analyses were accomplished by a PerkinElmer 240°C analyzer. The X-ray diffraction (XRD) with graphite monochromatized Cu-K $\alpha$  radiation ( $\lambda = 1.5418 \text{ \AA}$ ) were carried out by Rigaku D/Max-2500PC X-ray diffractometer at 40 kV, 40 mA. The FT-IR spectra (4000–400  $\text{cm}^{-1}$ ) were recorded on a Bruker VERTEX 80 V FTIR spectrophotometer. In the 25–800 °C range, the thermogravimetric analyses (TGA) were obtained by using a Netzsch STA449 F1 thermal analyzer at a heating rate of 10 °C /min under the air atmosphere protection. The fluorescence experiments of **1** and **2** were measured at room temperature on the Edinburgh FS5 fluorescence spectrophotometer.

## Single-Crystal X-ray Diffraction

X-ray diffraction data of **1** and **2** were received at room temperature on a Rigaku XtalLabMini diffractometer by monochromated Mo-K $\alpha$  radiation ( $\lambda = 0.71073 \text{ \AA}$ ) adopting  $\omega$ -scan mode at 296(2) K and further calculated by the CrysAlisPro program. The structures of **1** and **2** were solved by a SHELXT-2015, and further refined by SHELXL-2018/3 with full-matrix least-squares based on  $F^2$ . All of the non-hydrogen atoms were anisotropic. The H atoms of organic ligands are included in the calculated positions and the parent atoms are refined using isotropic thermal parameters riding of the parent atoms. The crystallographic data and structure determination statistics for two coordination compounds can be found in Table S1, and the necessary bond distances and angles are listed in Table S2.

## Photoelectrochemical properties

The experiments were carried out in a three-electrode cell. As-prepared sample powder dispersed with ethanol was coated onto a slice of ITO glass with an area of  $1.0 \times 1.0 \text{ cm}^2$  as a

working electrode. A saturated calomel electrode (SCE) and a  $0.5 \times 0.5 \text{ cm}^2$  Pt plate were used as the reference and counter electrodes, respectively. The electrolyte was 0.1 M  $\text{Na}_2\text{SO}_4$  aqueous solution. The light source was 300 W Xe lamp. The MottSchottky curves were also measured in 0.1 M  $\text{Na}_2\text{SO}_4$  aqueous solution. The AC amplitude was set as 10 mV and the frequency was 1000, 1500, 2000 Hz. Electrochemical impedance spectroscopy (EIS) was recorded with a potentiostat/galvanostat. The frequency range was explored from 10 mHz to 0.1 MHz.

### Formulas

$$\text{quenching efficiency} = (I_0 - I)/I_0 \times 100\% \quad (1)$$

where  $I_0$  and  $I$  are the maximum fluorescence intensities before and after the addition of the targeted species.

$$I_0/I - 1 = A \exp(R[M]) + b \quad (2)$$

where A, R and b represent constants and [M] is the concentration.

$$y(t) = B_1 e^{-t/\tau_1} + B_2 e^{-t/\tau_2} \quad (3)$$

where  $\tau_1$  and  $\tau_2$  represent the components of fluorescence lifetime,  $B_1$  and  $B_2$  are the corresponding amplitudes and  $t$  is the instantaneous time.

$$\tau_{avg} = (B_1 \tau_1^2 + B_2 \tau_2^2)/(B_1 \tau_1 + B_2 \tau_2) \quad (4)$$

In the equation,  $\tau$  is the lifetime and  $B$  is the preexponential factor.

1. **Table S1** Crystal and refinement data for complexes **1** and **2**.
2. **Table S2** Selected bond lengths [ $\text{\AA}$ ] and angles [ $^\circ$ ] for complexes **1** and **2**.
3. **Fig. S1**. 1D dual-core  $[\text{Co}(\text{DCDPE}^{2-})]_n$  chain in **1**.
4. **Fig. S2**. The infrared spectrums of **1** and **2**.
5. **Fig. S3**. TGA curves of **1** and **2**.
6. **Fig. S4**. Powder X-ray diffraction (PXRD) patterns of **1** and **2**.
7. **Fig. S5**. The change of the luminescent emission intensity of **1** (a) and **2** (b) in different pH solutions.
8. **Fig. S6**. Time-dependent emission spectra of **1** (a) and **2** (b) suspended in aqueous solutions.
9. **Fig. S7**. Time-dependent emission spectra of L ligands suspended in aqueous solutions.
10. **Fig. S8**. Comparison of the luminescent intensity of **1** (a) and **2** (b) in the presence of mixed organic solvents.
11. **Fig. S9**. Luminescent emission spectra of LEV and other quinolones in **1** at room temperature.
12. **Fig. S10**. Luminescent emission spectra of  $\text{Ni}^{2+}$  and other metal ions in **2** at room temperature.
13. **Fig. S11**. Time-resolved fluorescence spectra (symbols) with bi-exponential fit (solid lines) to the decay curves for **1** before and after addition of acac and LEV.
14. **Fig. S12**. Time-resolved fluorescence spectra (symbols) with bi-exponential fit (solid lines) to the decay curves for **2** before and after addition of acac and  $\text{Ni}^{2+}$ .
15. **Fig. S13**. PXRD patterns of **1** and **2** in various solutions
16. **Fig. S14**. Spectral overlap between the absorption spectra of acac and the excitation spectra of **1** and **2**.
17. **Fig. S15**. Spectral overlap between the absorption spectra of LEV and the excitation spectra of **1**.
18. **Fig. S16**. Spectral overlap between the absorption spectra of  $\text{Ni}^{2+}$  ions and the excitation spectra of **2**.

**Table S1** Crystal data and structure refinements for **1** and **2**.

|                                                              | <b>1</b>                                                                     | <b>2</b>                                                                        |
|--------------------------------------------------------------|------------------------------------------------------------------------------|---------------------------------------------------------------------------------|
| Empirical formula                                            | C <sub>29</sub> H <sub>22</sub> CoN <sub>3</sub> O <sub>5</sub>              | C <sub>76</sub> H <sub>66</sub> Co <sub>2</sub> N <sub>14</sub> O <sub>14</sub> |
| Formula weight                                               | 551.42                                                                       | 1517.28                                                                         |
| Temperature/K                                                | 296(2)                                                                       | 296(2)                                                                          |
| Crystal system                                               | monoclinic                                                                   | monoclinic                                                                      |
| Space group                                                  | <i>C2/c</i>                                                                  | <i>P2<sub>1</sub>/n</i>                                                         |
| <i>a</i> /Å                                                  | 14.1916(4)                                                                   | 12.6220(9)                                                                      |
| <i>b</i> /Å                                                  | 14.0430(5)                                                                   | 11.7644(9)                                                                      |
| <i>c</i> /Å                                                  | 26.3455(6)                                                                   | 23.5657(17)                                                                     |
| $\alpha$ /°                                                  | 90                                                                           | 90                                                                              |
| $\beta$ /°                                                   | 92.889(2)                                                                    | 95.079(6)                                                                       |
| $\gamma$ /°                                                  | 90                                                                           | 90                                                                              |
| <i>V</i> /Å <sup>3</sup>                                     | 5243.8(3)                                                                    | 3485.5(4)                                                                       |
| <i>Z</i>                                                     | 8                                                                            | 2                                                                               |
| <i>D</i> <sub>calc</sub> (g/cm <sup>3</sup> )                | 1.397                                                                        | 1.446                                                                           |
| $\mu$ /mm <sup>-1</sup>                                      | 0.699                                                                        | 0.555                                                                           |
| <i>F</i> (000)                                               | 2272.0                                                                       | 12.6220(9)                                                                      |
| Crystal size/mm <sup>3</sup>                                 | 0.21 × 0.19 × 0.18                                                           | 0.21 × 0.21 × 0.19                                                              |
| Radiation                                                    | MoK $\alpha$ ( $\lambda$ = 0.71073)                                          | MoK $\alpha$ ( $\lambda$ = 0.71073)                                             |
| $\Theta$ range for data collection/°                         | 4.314 to 61.024                                                              | 4.742 to 61.158                                                                 |
| Index ranges                                                 | -20 ≤ <i>h</i> ≤ 19, -18 ≤ <i>k</i> ≤ 19, -37 ≤ <i>l</i> ≤ 37                | -16 ≤ <i>h</i> ≤ 17, -16 ≤ <i>k</i> ≤ 16, -33 ≤ <i>l</i> ≤ 29                   |
| Reflections collected                                        | 38274                                                                        | 56420                                                                           |
| Independent reflections                                      | 7786 [ <i>R</i> <sub>int</sub> = 0.0369, <i>R</i> <sub>sigma</sub> = 0.0411] | 8027 [ <i>R</i> <sub>int</sub> = 0.0549, <i>R</i> <sub>sigma</sub> = 0.0413]    |
| Data/restraints/parameters                                   | 7786/0/343                                                                   | 10181/48/503                                                                    |
| Goodness-of-fit on <i>F</i> <sup>2</sup>                     | 1.030                                                                        | 1.021                                                                           |
| Final <i>R</i> indexes [ <i>I</i> ≥ 2 $\sigma$ ( <i>I</i> )] | <i>R</i> <sub>1</sub> = 0.0607, <i>wR</i> <sub>2</sub> = 0.1516              | <i>R</i> <sub>1</sub> = 0.0505, <i>wR</i> <sub>2</sub> = 0.1107                 |
| Final <i>R</i> indexes [all data]                            | <i>R</i> <sub>1</sub> = 0.1103, <i>wR</i> <sub>2</sub> = 0.1774              | <i>R</i> <sub>1</sub> = 0.0844, <i>wR</i> <sub>2</sub> = 0.1267                 |
| Largest diff. peak/hole / e Å <sup>-3</sup>                  | 0.52/-0.42                                                                   | 1.09/-0.72                                                                      |

**Table S2** Selected bond lengths [Å] and angles [°] for the **1** and **2**.

| Parameter    | Value      | Parameter    | Value      |
|--------------|------------|--------------|------------|
| <b>1</b>     |            |              |            |
| Co1–O1       | 2.05 (2)   | Co1–O1A      | 2.07 (19)  |
| Co1–O5B      | 2.17(2)    | Co1–O4B      | 2.15(3)    |
| Co1–N3       | 2.16(3)    | Co1–N1       | 2.10(2)    |
| N1–Co1–N3    | 75.85(10)  | O1–Co1–O1B   | 77.49(7)   |
| O1B–Co1–O5B  | 88.18(8)   | O1–Co1–O5B   | 161.85(8)  |
| O1B–Co1–O4B  | 98.49(8)   | O1B–Co1–O4B  | 98.49(8)   |
| O1–Co1–O4B   | 109.52(9)  | O1–Co1–N3    | 98.86(9)   |
| O1B–Co1–N3   | 100.36(9)  | O1B–Co1–N3   | 100.36(9)  |
| O1B–Co1–N1   | 167.07(10) | O1–Co1–N1    | 90.78(8)   |
| O1B–Co1–C12B | 94.73(9)   | O1–Co1–C12B  | 138.64(10) |
| O5B–Co1–C12B | 30.60(9)   | O4B–Co1–O5B  | 61.22(8)   |
| O4B–Co1–N3   | 148.69(9)  | O4B–Co1–C12B | 30.64(9)   |
| N3–Co1–O5B   | 94.59(8)   | N3–Co1–C12B  | 122.48(10) |
| N1–Co1–O5B   | 104.36(9)  | N1–Co1–O4B   | 90.49(10)  |
| N1–Co1–C12B  | 97.71(10)  |              |            |
| <b>2</b>     |            |              |            |
| Co1–O2       | 2.03(16)   | Co1–O4       | 2.09 (15)  |
| Co1–N3       | 2.12(17)   | Co1–N4       | 2.16(18)   |
| Co1–N6A      | 2.13(18)   | Co1–N7A      | 2.18(18)   |
| O2–Co1–O4    | 86.09(6)   | O2–Co1–N6A   | 94.93(7)   |
| O2–Co1–N7A   | 87.50(7)   | O4–Co1–N3    | 90.78(6)   |
| O4–Co1–N4    | 94.89(6)   | O4–Co1–N6A   | 168.56(7)  |
| O4–Co1–N7A   | 92.71(6)   | N3–Co1–N4    | 76.18(7)   |
| N3–Co1–N6A   | 89.26(7)   | N3–Co1–N7A   | 98.35(7)   |
| N4–Co1–N7A   | 170.67(7)  | N6A–Co1–N4   | 96.22(7)   |
| N6A–Co1–N7A  | 75.97(7)   |              |            |

Symmetry codes for **1**: A:  $1/2-x, 3/2-y, 1-z$ ; B:  $1/2+x, 3/2-y, 1/2+z$ ; C:  $1-x, +y, 1/2-z$ ; For **2**: A:

$1-x, 1-y, 1-z$ ; B:  $3/2-x, 1/2+y, 3/2-z$ ; C:  $2-x, 2-y, 1-z$ ;

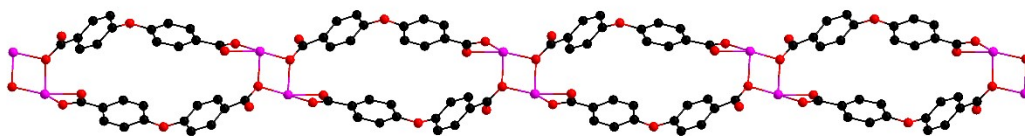

**Fig. S1.** 1D dual-core  $[\text{Co}(\text{DCDPE}^{2-})]_n$  chain in **1**.

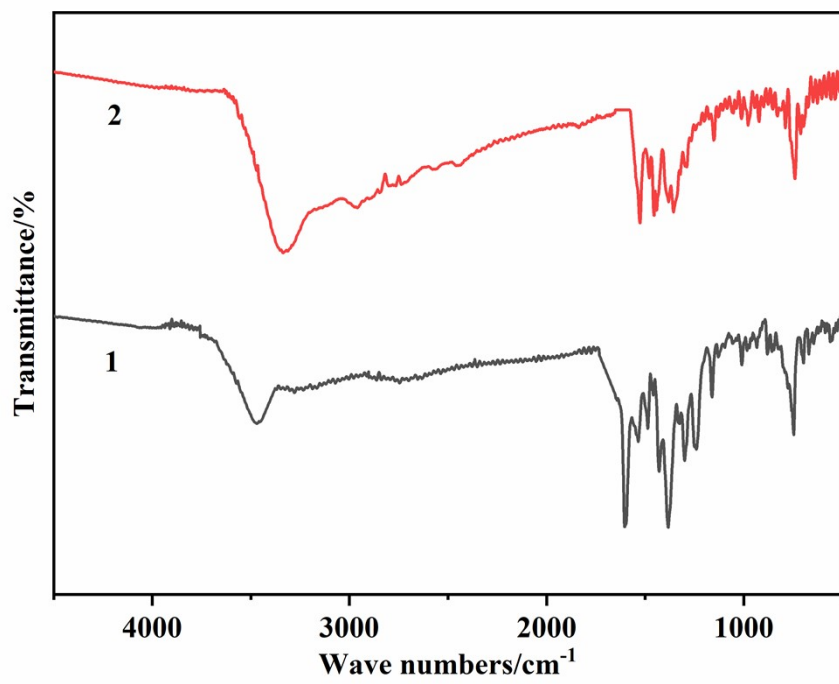

**Fig. S2.** The infrared spectrums of **1** and **2**.



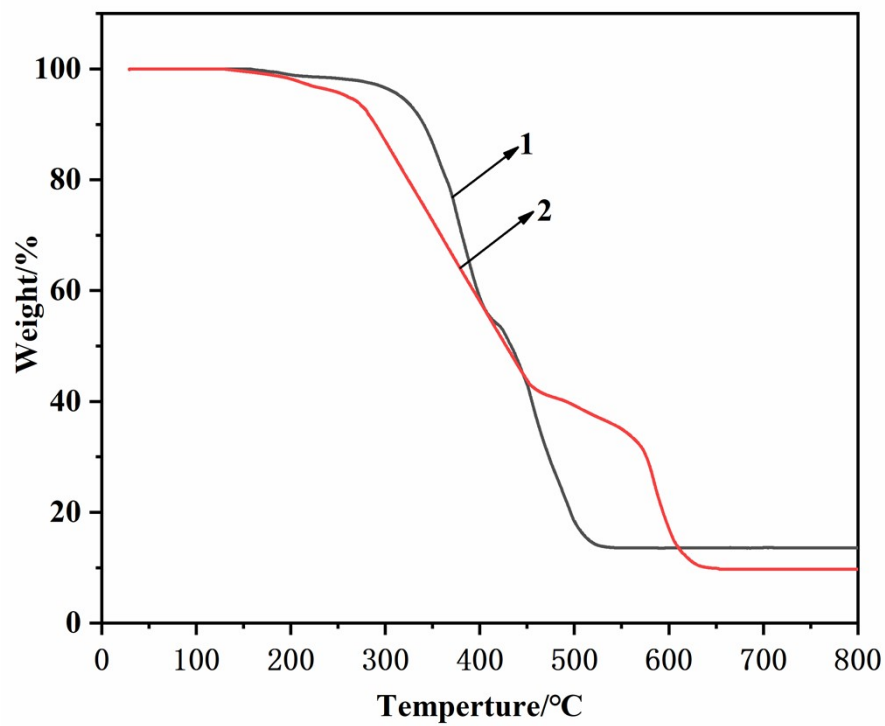

**Fig. S3.** TGA curves of **1** and **2**.

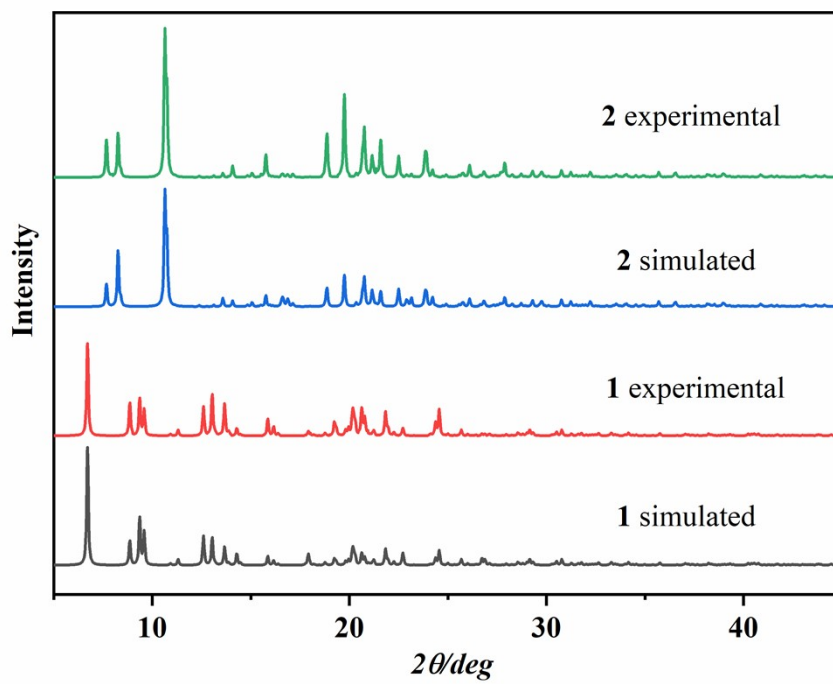

**Fig. S4.** Powder X-ray diffraction (PXRD) patterns of **1** and **2**.

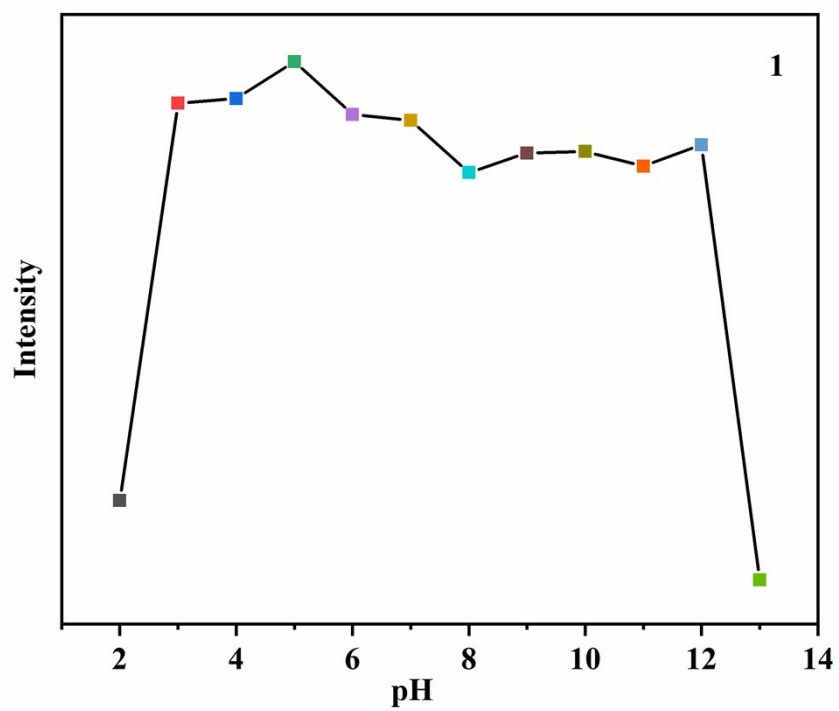

(a)

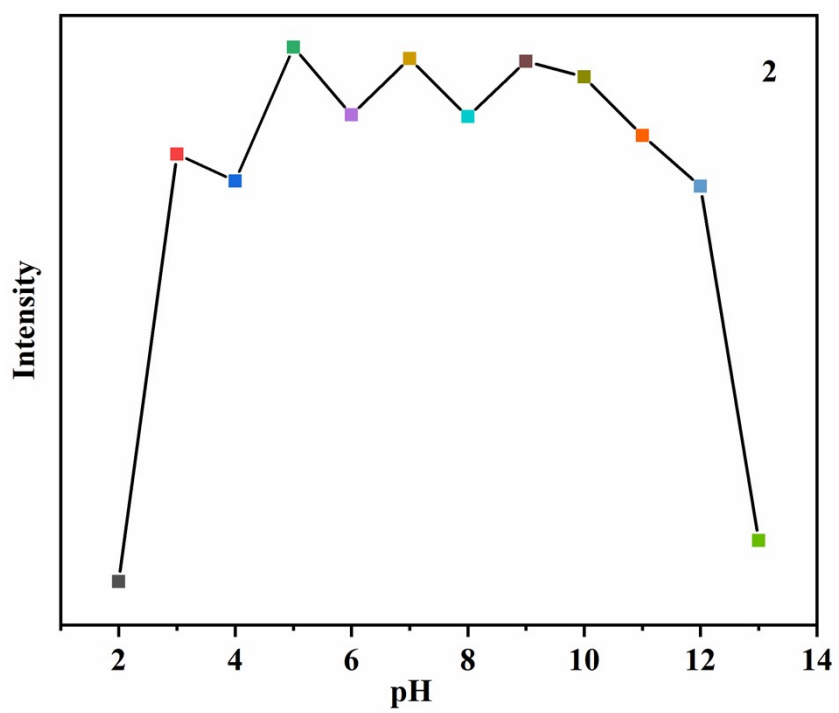

(b)

**Fig. S5.** The change of the luminescent emission intensity of 1 (a) and 2 (b) in different pH solutions.

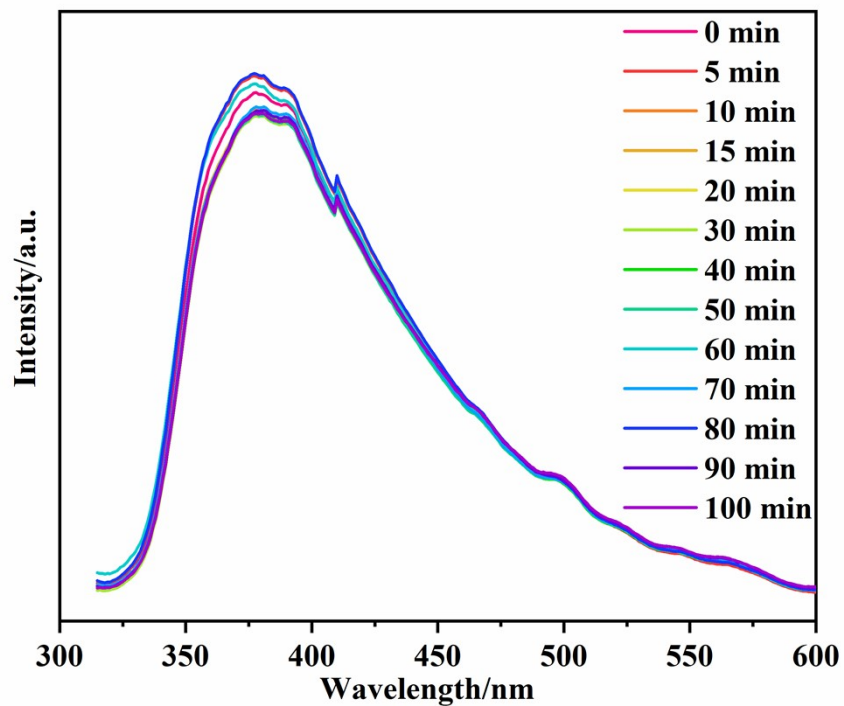

(a)

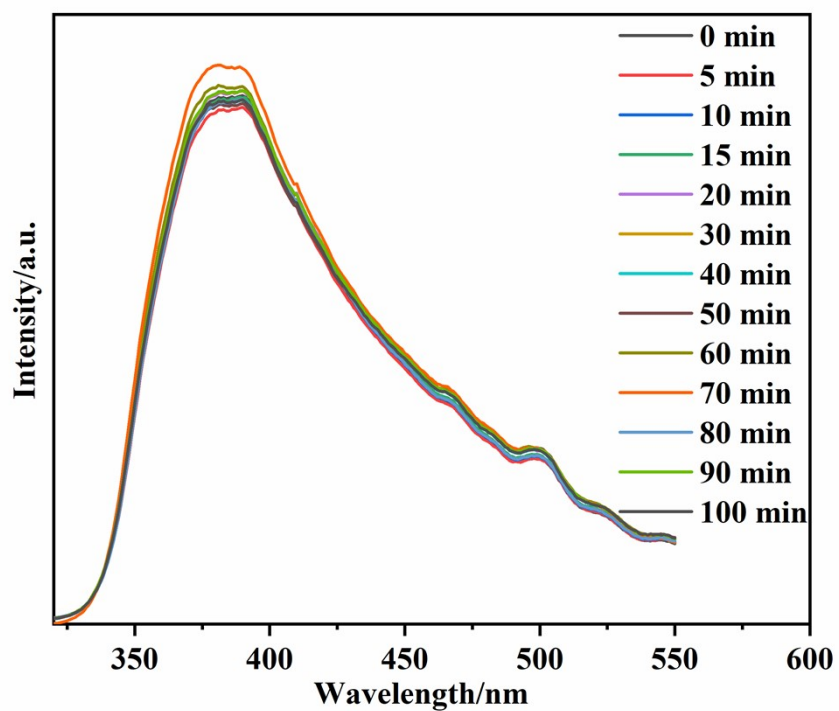

(b)

Fig. S6. Time-dependent emission spectra of 1 (a) and 2 (b) suspended in aqueous solutions.

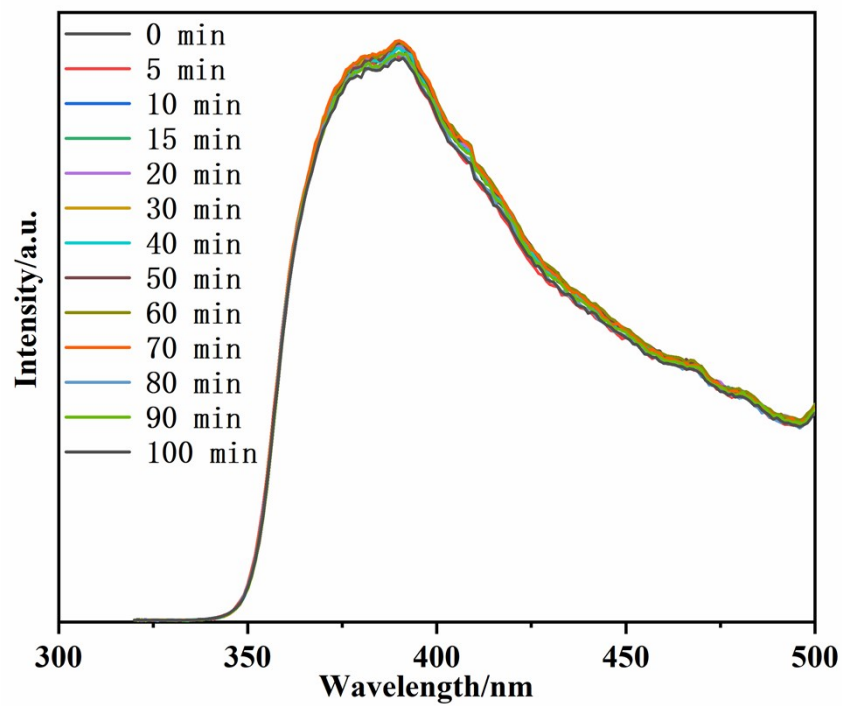

**Fig. S7.** Time-dependent emission spectra of L ligands suspended in aqueous solutions.

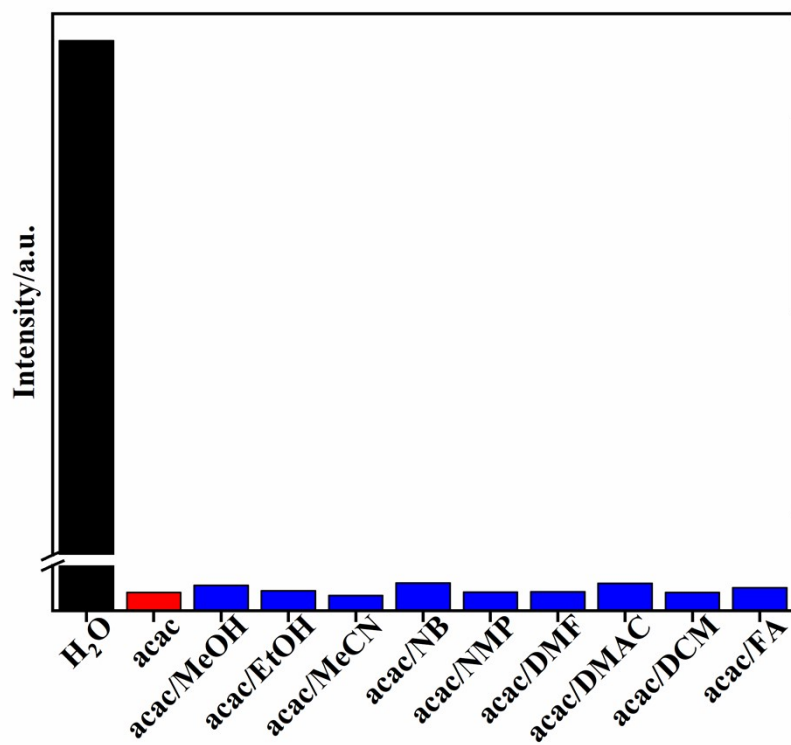

(a)

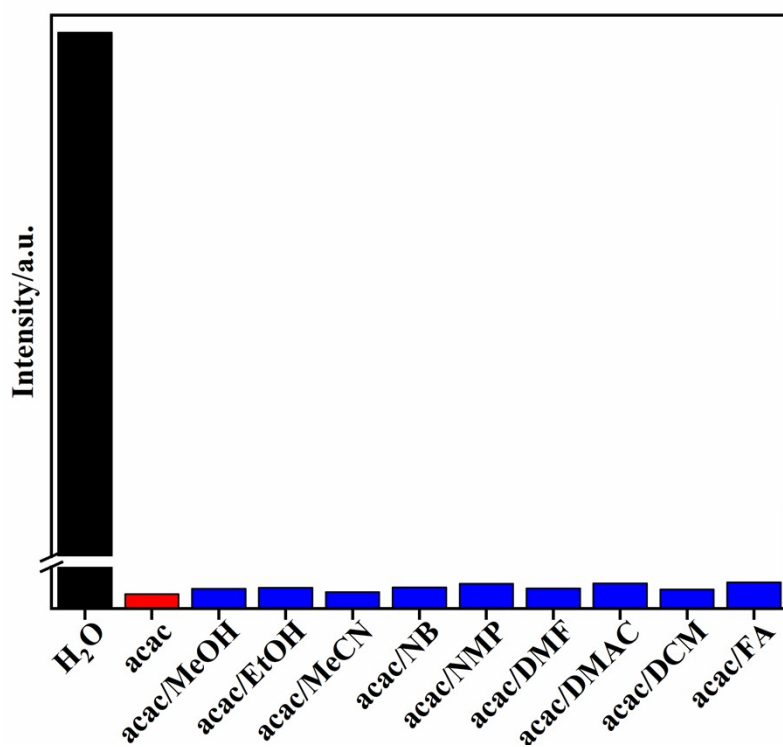

(b)

**Fig. S8.** Comparison of the luminescent intensity of 1 (a) and 2 (b) in the presence of mixed organic solvents.

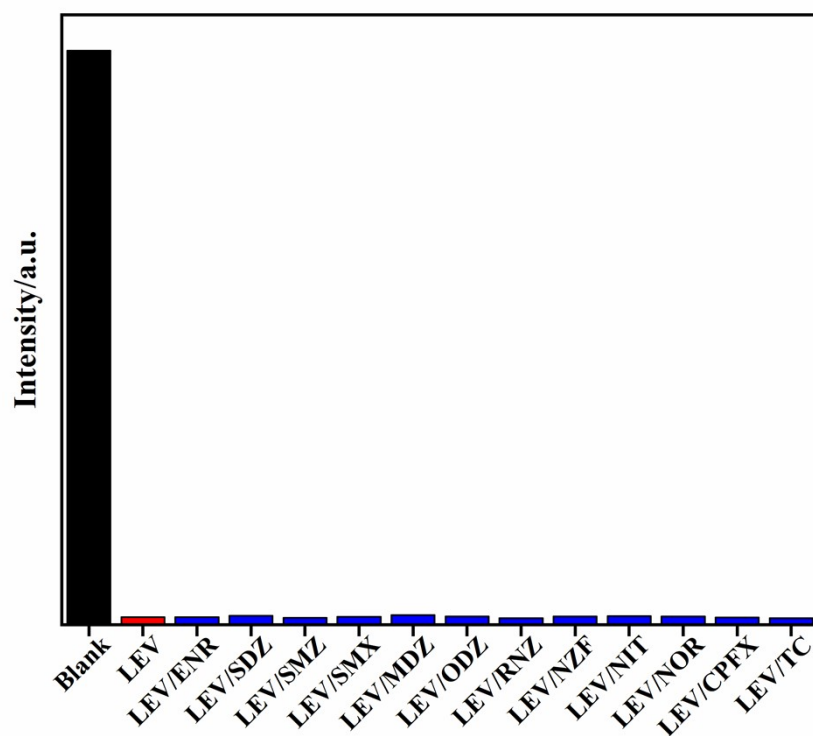

Fig. S9. Luminescent emission spectra of LEV and other quinolones in **1** at room temperature.

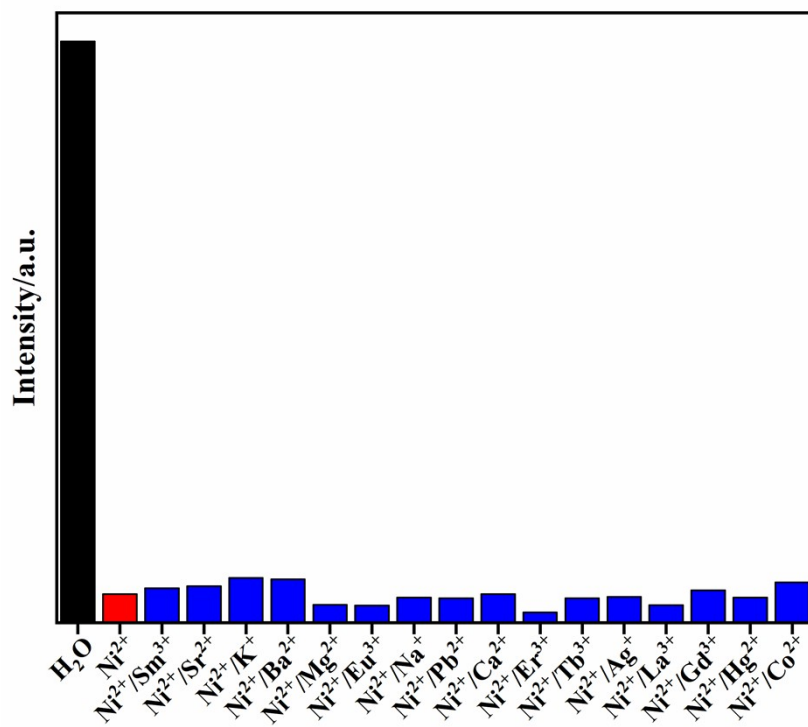

**Fig. S10.** Luminescent emission spectra of Ni<sup>2+</sup> and other metal ions in **2** at room temperature.



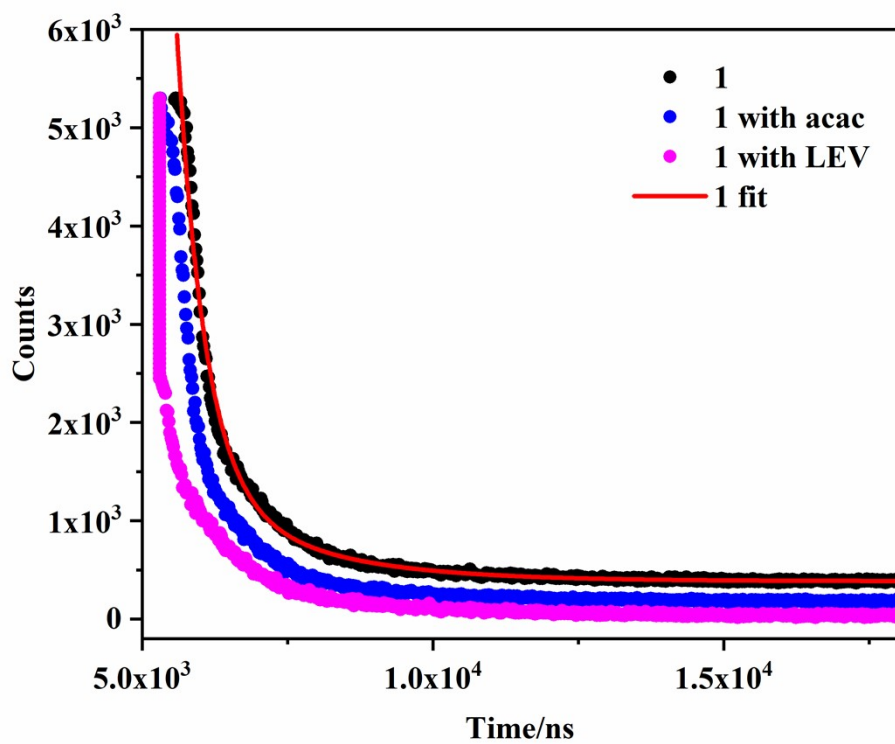

**Fig. S11.** Time-resolved fluorescence spectra (symbols) with bi-exponential fit (solid lines) to the decay curves for **1** before and after addition of acac and LEV.

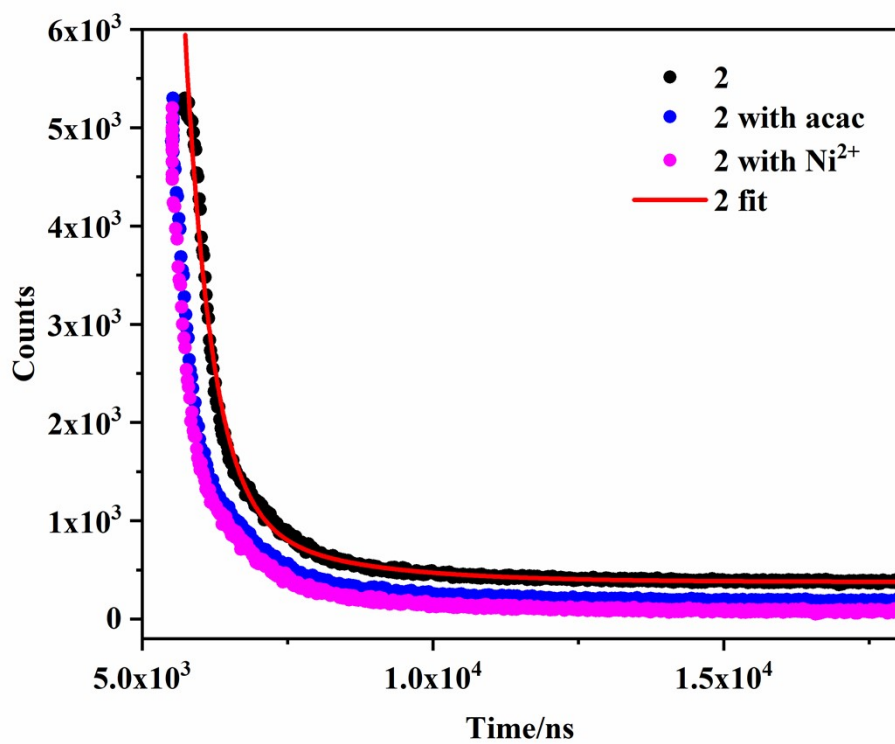

**Fig. S12.** Time-resolved fluorescence spectra (symbols) with bi-exponential fit (solid lines) to the decay curves for **2** before and after addition of acac and Ni<sup>2+</sup>.

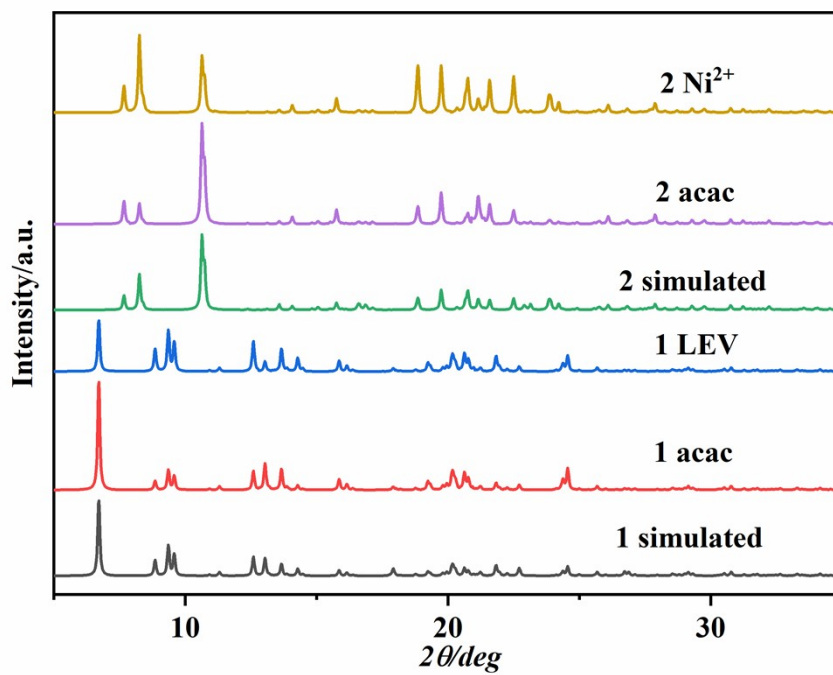

Fig. S13. PXRD patterns of **1** and **2** in various solutions

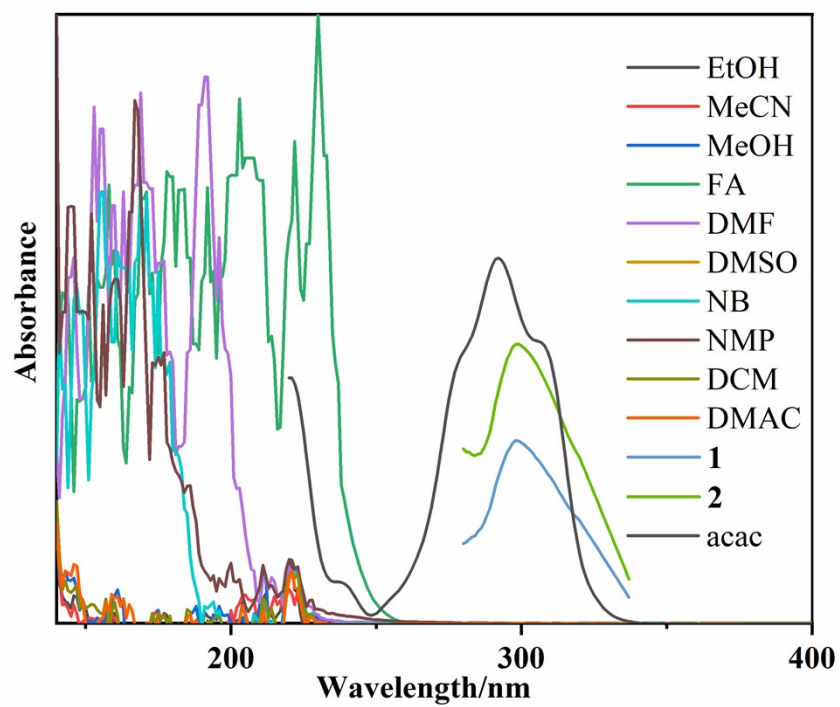

**Fig. S14.** Spectral overlap between the absorption spectra of acac and the excitation spectra of **1**

and **2**.

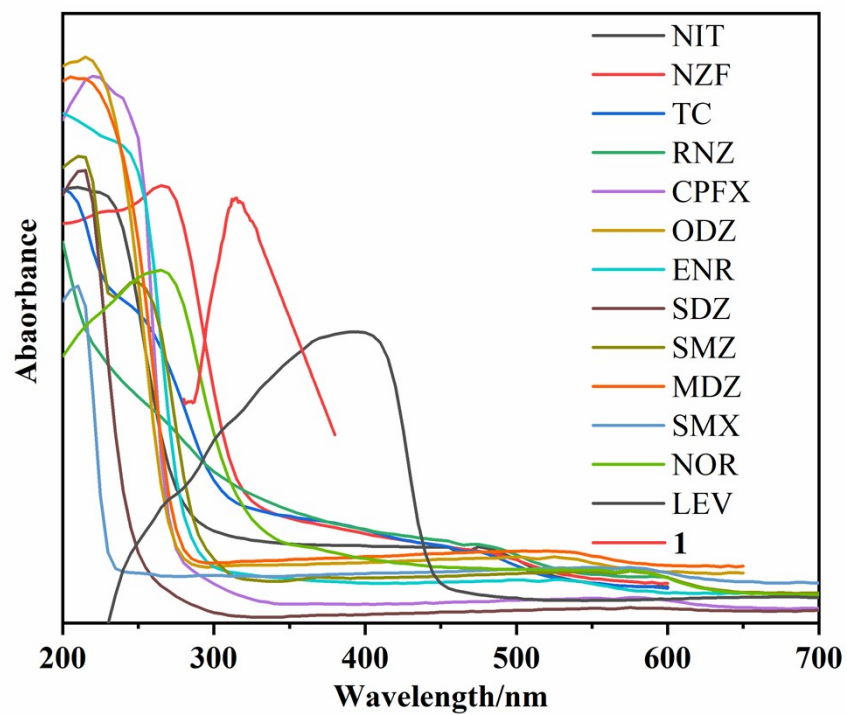

Fig. S15. Spectral overlap between the absorption spectra of LEV and the excitation spectra of **1**.

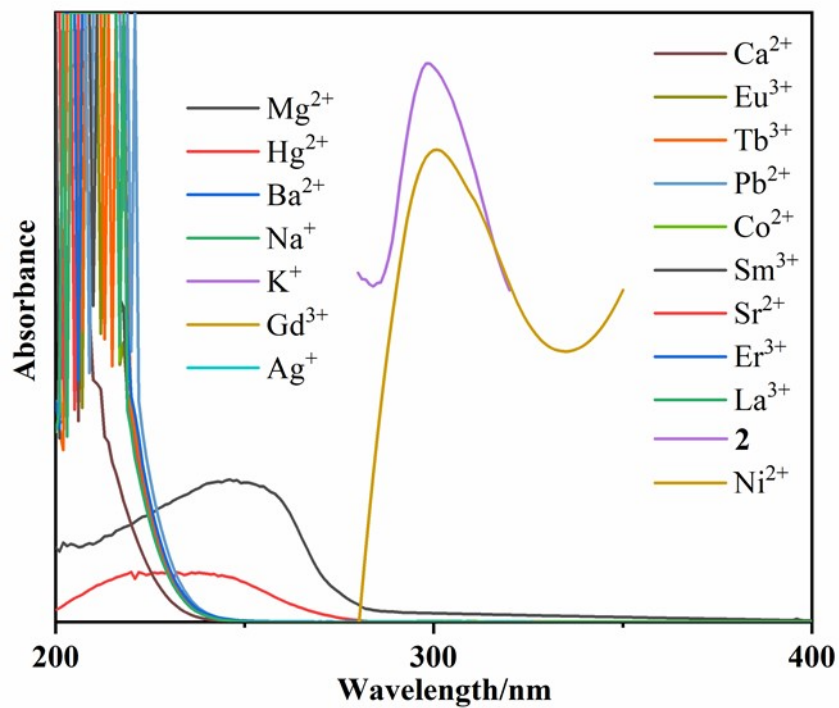

Fig. S16. Spectral overlap between the absorption spectra of Ni<sup>2+</sup> ions and the excitation spectra

of 2.
